# Supplementary material
Source: HighWire-hosted journal article supplement (https://sti.bmj.com/content/94/7/494)
Supplement: inline-supplementary-material-1 [file inline-supplementary-material-1.docx]

**Sensitivity analysis: Table 4:** Prevalence of HIV related behaviours among MSM in the AURAH (n=991) and AURAH2 (n=1031) study and association of these measures with study (missing values treated as a separate category for each variable in adjusted models).

| **Measures of sexual behaviour** | **Study** | **Prevalence n(%) (95% CI)** | **Unadjusted PR (95% CI)**  **AURAH* vs AURAH2** | **p value**** | **Adjusted* PR (95%CI)** | **p value**** |
| --- | --- | --- | --- | --- | --- | --- |
|
| CLS**a** with one or more partners (past 3 months) | AURAH | 558 (56.3%) (53.2%, 59.4%) | 1.14 (1.07, 1.22) | <0.001 | 1.14 (1.05, 1.23) | 0.001 |
| AURAH2 | 664 (64.4%) (61.4%, 67.3%) |
| CLS with two or more partners (past 3 months) | AURAH | 286 (28.8%) (26.1%, 31.8%) | 1.22 (1.08, 1.39) | 0.002 | 1.22 (1.05, 1.41) | 0.008 |
| AURAH2 | 365 (35.4%) (32.5%, 38.4%) |
| CLS with unknown/HIV+ status partner(s) (past 3 months) | AURAH | 310 (31.3%) (28.4%, 34.2) | 1.00 (0.88, 1.14) | 0.944 | 0.98 (0.85, 1.14) | 0.893 |
| AURAH2 | 324 (31.4%) (28.7%, 34.3%) |
| Receptive CLS with unknown HIV status partner(s) (past 3 months) | AURAH | 116 (11.7%) (9.8%, 13.8%) | 1.06 (0.84, 1.34) | 0.624 | 0.98 (0.75, 1.28) | 0.901 |
| AURAH2 | 128 (12.4%) (10.5%, 14.6%) |
| Self reported bacterial STIb diagnosis (past year) | AURAH | 303 (30.5%) (27.8%, 33.5%) | 1.30 (1.15, 1.47) | <0.001 | 1.24 (1.08, 1.43) | 0.002 |
| AURAH2 | 411 (39.8%) (36.9%, 42.9%) |
| Eleven or more new sexual partners (past year) | AURAH | 374 (37.7%) (34.8%, 40.1%) | 1.07 (0.97, 1.20) | 0.168 | 1.10 (0.98, 1.25) | 0.097 |
| AURAH2 | 420 (40.7%) (37.8%, 43.7%) |
| Group sex (past 3 months) | AURAH | 388 (39.1%) (36.2%, 42.2%) | 1.09 (0.99, 1.22) | 0.069 | 1.11 (0.98, 1.25) | 0.08 |
| AURAH2 | 438 (42.5) (39.5%, 45.5%) |
| PEPc use (past year) | AURAH | 151 (15.2%) (13.1%, 17.6%) | 1.43 (1.18, 1.72) | <0.001 | 1.50 (1.21, 1.87) | <0.001 |
| AURAH2 | 224 (21.7%) (19.3%, 24.4%) |
| PrEPd use (past year) | AURAH | 38 (3.8%) (2.5%, 4.5%) | 1.44 (0.97, 2.15) | 0.074 | 1.31 (0.70, 1.82) | 0.611 |
| AURAH2 | 57 (5.5%) (4.3%, 7.1%) |
| Recent HIV test (past 6 months) | AURAH | 631 (63.8%) (60.7%, 66.7%) | 1.15 (1.08, 1.22) | <0.001 | 1.14 (1.06, 1.22) | <0.001 |
| AURAH2 | 757(73.4%) (70.6%, 76.0%) |

**a**Condomless sex bSexually transmitted infection cPost exposure prohylaxis dPre-exposure prophylaxis

* AURAH is the reference group

****** Adjusted model (ii) study, age (continuous variable), ethnicity, sexual identity, university education, ongoing relationship status,(missing values treated as a separate category for each variable in adjusted models) ********p value* by Wald test
